# Supplementary material for: Transferrin Mediated NCC Killing Activity through NCCRP-1 in Nile Tilapia (Oreochromis niloticus)
Source: MDPI journal article supplement (doi:10.3390/fishes7050253), 2022-09-23
Supplement: s1 [file s1]

**TABLE S2** GenBank accession numbers of relative genes of tilapia used in this study.

| Protein      | Accession no.  |
|--------------|----------------|
| TNF $\alpha$ | AY428948.1     |
| NCCRP-1      | MF162296       |
| Granzyme     | AY918866.1     |
| FasL         | KM008610.1     |
| CAS          | AF547173       |
| FADD         | XM_003456561.5 |
| NK-lysin     | ATW66454.1     |
